# Supplementary material for: Diagnostic classification of cancers using DNA methylation of paracancerous tissues
Source: Sci Rep. 2022 Jun 23;12:10646. doi: 10.1038/s41598-022-14786-7 (PMC9226137; doi:10.1038/s41598-022-14786-7)
Supplement: Supplementary file 1 — Supplementary Information. [file 41598_2022_14786_MOESM1_ESM.xlsx]

## Sheet: Supplementary Table S1
Diagnostic classification of cancers using DNA methylation of paracancerous tissues Baoshan Ma, Bingjie Chai, Heng Dong, Jishuang Qi, Pengcheng Wang, Tong Xiong, Yi Gong, Di Li, Shuxin Liu, Fengju Song
Supplementary Table S1: The AUC values of XGBoost、SVM、RF、KNN and NB obtained in each fold on all datasets.
Cohort	Fold	XGBoost	SVM	RF	KNN	NB
KIRC	1	0.797	0.814	0.749	0.697	0.693
	2	0.812	0.851	0.824	0.847	0.782
	3	0.725	0.678	0.643	0.651	0.59
	4	0.806	0.749	0.743	0.7	0.686
	5	0.761	0.729	0.757	0.808	0.62
	Mean	0.7802	0.7642	0.7432	0.7406	0.6742
	Variance	0.00107496	0.00378296	0.00335856	0.00548824	0.00442816
BRCA	1	0.563	0.635	0.208	0.542	0.406
	2	0.771	0.443	0.671	0.514	0.664
	3	0.214	0.436	0.214	0.471	0.357
	4	0.467	0.5	0.317	0.525	0.333
	5	0.567	0.267	0.45	0.475	0.4
	Mean	0.5164	0.4562	0.372	0.5054	0.432
	Variance	0.0326878	0.0140534	0.030074	0.00078104	0.01419
THCA	1	0.625	0.75	0.46875	0.625	0.516
	2	1	0.708	0.896	0.417	0.8125
	3	0.821	0.571	0.679	0.571	0.607
	4	0.9	1	0.8	1	0.35
	5	0.75	0.833	0.75	0.792	0.8125
	Mean	0.8192	0.7724	0.71875	0.681	0.6196
	Variance	0.0163446	0.020137	0.0206152	0.0398028	0.0315993
HNSC	1	0.667	0.556	0.556	0.889	0.5
	2	1	0.667	0.889	0.722	0.5
	3	0.6875	0.5	0.5	0.5	0.5
	4	0.714	0.5	0.905	0.738	0.5
	5	0.222	0.889	0.222	0.167	0.5
	Mean	0.6581	0.6224	0.6144	0.6032	0.5
	Variance	0.0622294	0.0214874	0.0660658	0.0629774	0
KIRP	1	0.55	0.5	0.45	0.45	0.55
	2	0.8	0.65	0.55	0.7	0.35
	3	0.65	0.2	0.85	0.875	0.575
	4	0.5	0.5	0.611	0.639	0.417
	5	0.5	0.857	0.107	0.214	0.143
	Mean	0.6	0.5414	0.5136	0.5756	0.407
	Variance	0.013	0.0462758	0.058669	0.051133	0.0243436
LUSC	1	0.375	0.875	0.4375	0.375	0.5
	2	0.714	0	0.357	0.714	0.5
	3	0.5	0.25	0.542	1	0.5
	4	0.571	0.857	1	0.357	0.5
	5	0.667	0.583	0.25	0.333	0.5
	Mean	0.5654	0.513	0.5173	0.5558	0.5
	Variance	0.014593	0.117324	0.0674246	0.0688382	0
LIHC	1	0.857	0.5	0.714	0.857	0.5
	2	0.867	0.5	0.733	0.533	0.5
	3	0.833	0.75	0.708	0.75	0.5
	4	0.467	0.5	0.467	0.467	0.567
	5	0.583	0.5	0.5	0.583	0.5
	Mean	0.7214	0.55	0.6244	0.638	0.5134
	Variance	0.027183	0.01	0.0134122	0.0207592	0.00071824
COAD	1	0.75	0.5	0.583	0.583	0.667
	2	0.467	0.467	0.4	0.867	0.7
	3	0.625	0.5	0.75	0.875	0.625
	4	1	0.5	1	1	1
	5	0.833	0.667	0.833	0.333	0.417
	Mean	0.735	0.5268	0.7132	0.7316	0.6818
	Variance	0.0327956	0.00507736	0.0426014	0.0583798	0.0350294
UCEC	1	1	0.5	1	1	0.833
	2	1	0.5	0.9	0.6	0.75
	3	0.5	0.583	0.292	0.458	0.458
	4	0.5	0.5	0.167	0.5	0.333
	5	0.25	1	0.375	0.5	0.625
	Mean	0.65	0.6166	0.5468	0.6116	0.5998
	Variance	0.09	0.0377822	0.113765	0.0398982	0.0337734

## Sheet: Supplementary Table S2
Supplementary Table S2: The ACC values of XGBoost、SVM、RF、KNN and NB obtained in each fold on all datasets.
Cohort	Fold	XGBoost	SVM	RF	KNN	NB
KIRC	1	0.656	0.719	0.594	0.531	0.625
	2	0.688	0.75	0.625	0.813	0.781
	3	0.656	0.594	0.563	0.688	0.594
	4	0.688	0.656	0.625	0.531	0.656
	5	0.688	0.531	0.594	0.781	0.625
	Mean	0.6752	0.65	0.6002	0.6688	0.6562
	Variance	0.00024576	0.0064188	0.00053816	0.0143458	0.00427816
BRCA	1	0.842	0.842	0.842	0.789	0.684
	2	0.789	0.737	0.737	0.737	0.789
	3	0.737	0.737	0.737	0.632	0.526
	4	0.789	0.789	0.789	0.684	0.526
	5	0.789	0.789	0.789	0.789	0.632
	Mean	0.7892	0.7788	0.7788	0.7262	0.6314
	Variance	0.00110256	0.00153936	0.00153936	0.00373176	0.00996464
THCA	1	0.583	0.583	0.667	0.583	0.667
	2	0.909	0.727	0.727	0.545	0.727
	3	0.727	0.727	0.727	0.727	0.636
	4	0.909	1	0.909	0.818	0.636
	5	0.545	0.636	0.636	0.636	0.727
	Mean	0.7346	0.7346	0.7332	0.6618	0.6786
	Variance	0.0239638	0.0206514	0.00896256	0.00983336	0.00168984
HNSC	1	0.9	0.9	0.9	0.9	0.9
	2	0.9	0.9	0.9	0.9	0.9
	3	0.8	0.8	0.8	0.8	0.8
	4	0.7	0.7	0.7	0.7	0.7
	5	0.9	0.9	0.8	0.9	0.9
	Mean	0.84	0.84	0.82	0.84	0.84
	Variance	0.0064	0.0064	0.0056	0.0064	0.0064
KIRP	1	0.333	0.444	0.444	0.444	0.556
	2	0.667	0.444	0.556	0.444	0.333
	3	0.667	0.778	0.556	0.556	0.556
	4	0.333	0.333	0.667	0.556	0.444
	5	0.222	0.222	0.333	0.333	0.222
	Mean	0.4444	0.4442	0.5112	0.4666	0.4222
	Variance	0.0346766	0.0346322	0.0129118	0.00697104	0.0168634
LUSC	1	0.889	0.889	0.889	0.889	0.889
	2	0.875	0.875	0.875	0.875	0.875
	3	0.75	0.75	0.75	0.875	0.75
	4	0.875	0.875	0.875	0.875	0.875
	5	0.75	0.75	0.75	0.625	0.75
	Mean	0.8278	0.8278	0.8278	0.8278	0.8278
	Variance	0.00406136	0.00406136	0.00406136	0.0103114	0.00406136
LIHC	1	0.75	0.875	0.875	0.875	0.875
	2	0.625	0.625	0.625	0.625	0.625
	3	0.75	0.75	0.75	0.625	0.75
	4	0.5	0.625	0.625	0.625	0.625
	5	0.75	0.75	0.75	0.875	0.75
	Mean	0.675	0.725	0.725	0.725	0.725
	Variance	0.01	0.00875	0.00875	0.015	0.00875
COAD	1	0.375	0.25	0.25	0.25	0.5
	2	0.375	0.625	0.625	0.75	0.625
	3	0.625	0.5	0.625	0.625	0.625
	4	0.857	0.857	0.857	0.714	1
	5	0.714	0.857	0.857	0.571	0.714
	Mean	0.5892	0.6178	0.6428	0.582	0.6928
	Variance	0.0360674	0.0527278	0.0493378	0.0315684	0.0282374
UCEC	1	0.857	0.857	0.714	0.714	0.714
	2	1	0.714	0.714	0.571	0.857
	3	0.429	0.429	0.429	0.429	0.429
	4	0.714	0.857	0.714	0.571	0.571
	5	0.333	0.333	0.333	0.5	0.5
	Mean	0.6666	0.638	0.5808	0.557	0.6142
	Variance	0.0634794	0.0476808	0.027535	0.0089348	0.0236238

## Sheet: Supplementary Table S3
Supplementary Table S3: The AUPR values of XGBoost、SVM、RF、KNN and NB obtained in each fold on all datasets.
Cohort	Fold	XGBoost	SVM	RF	KNN	NB
KIRC	1	0.875	0.897	0.86	0.841	0.865
	2	0.825	0.854	0.843	0.861	0.822
	3	0.791	0.754	0.715	0.639	0.723
	4	0.879	0.833	0.829	0.783	0.82
	5	0.838	0.799	0.838	0.849	0.747
	Mean	0.8416	0.8274	0.817	0.7946	0.7954
	Variance	0.00107264	0.00235544	0.0027028	0.00677344	0.00274824
BRCA	1	0.446	0.197	0.095	0.151	0.079
	2	0.559	0.267	0.328	0.417	0.612
	3	0.167	0.254	0.166	0.228	0.132
	4	0.219	0.605	0.151	0.209	0.105
	5	0.223	0.138	0.177	0.309	0.105
	Mean	0.3228	0.2922	0.1834	0.2628	0.2066
	Variance	0.0231954	0.0265558	0.00602344	0.00850336	0.0413682
THCA	1	0.355	0.455	0.289	0.359	0.438
	2	1	0.344	0.794	0.218	0.75
	3	0.707	0.57	0.578	0.539	0.591
	4	0.25	1	0.167	1	0.045
	5	0.378	0.461	0.378	0.406	0.75
	Mean	0.538	0.566	0.4412	0.5044	0.5148
	Variance	0.0768076	0.0522004	0.0491054	0.071933	0.068611
HNSC	1	0.96	0.943	0.943	0.989	0.95
	2	1	0.96	0.988	0.968	0.95
	3	0.915	0.9	0.858	0.89	0.9
	4	0.884	0.85	0.966	0.885	0.85
	5	0.865	0.988	0.865	0.855	0.95
	Mean	0.9248	0.9282	0.924	0.9174	0.92
	Variance	0.00244616	0.00234336	0.0028116	0.00267624	0.0016
KIRP	1	0.698	0.722	0.552	0.543	0.611
	2	0.579	0.642	0.42	0.65	0.528
	3	0.583	0.528	0.858	0.936	0.7
	4	0.667	0.539	0.625	0.708	0.403
	5	0.889	0.966	0.648	0.708	0.671
	Mean	0.6832	0.6794	0.6206	0.709	0.5826
	Variance	0.0127466	0.0255974	0.020415	0.0165136	0.0115282
LUSC	1	0.083	0.25	0.083	0.056	0.556
	2	0.167	0.063	0.083	0.167	0.563
	3	0.238	0.163	0.246	1	0.625
	4	0.125	0.25	1	0.062	0.563
	5	0.288	0.258	0.163	0.125	0.625
	Mean	0.1802	0.1968	0.315	0.282	0.5864
	Variance	0.00552616	0.00569016	0.120948	0.130575	0.00099984
LIHC	1	0.25	0.5625	0.167	0.25	0.5625
	2	0.85	0.6875	0.794	0.596	0.6875
	3	0.708	0.6625	0.308	0.333	0.625
	4	0.332	0.6875	0.549	0.571	0.542
	5	0.246	0.625	0.598	0.613	0.625
	Mean	0.4772	0.645	0.4832	0.4726	0.6084
	Variance	0.063681	0.002225	0.0489566	0.0227322	0.00266474
COAD	1	0.906	0.818	0.866	0.866	0.917
	2	0.549	0.549	0.299	0.85	0.75
	3	0.65	0.75	0.579	0.871	0.708
	4	1	0.571	1	1	1
	5	0.25	0.6	0.25	0.1	0.071
	Mean	0.671	0.6576	0.5988	0.7374	0.6892
	Variance	0.0712064	0.0113754	0.0888582	0.104461	0.106942
UCEC	1	0.75	0.571	1	1	0.667
	2	1	0.643	0.792	0.2875	0.821
	3	0.786	0.707	0.434	0.589	0.589
	4	0.071	0.571	0.083	0.125	0.071
	5	0.833	1	0.692	0.808	0.875
	Mean	0.688	0.6984	0.6002	0.5619	0.6046
	Variance	0.102501	0.0253134	0.100035	0.103882	0.0817622

## Sheet: Supplementary Table S4
Supplementary Table S4: The MCC values of XGBoost、SVM、RF、KNN and NB obtained in each fold on all datasets.
Cohort	Fold	XGBoost	SVM	RF	KNN	NB
KIRC	1	0.29	0.461	0.197	0.204	0.385
	2	0.38	0.506	0.267	0.639	0.564
	3	0.325	0.178	0.111	0.394	0.181
	4	0.394	0.345	0.267	0.146	0.378
	5	0.375	0	0.181	0.576	0.243
	Mean	0.3528	0.298	0.2046	0.3918	0.3502
	Variance	0.00152936	0.0350492	0.00343264	0.0381458	0.017563
BRCA	1	0	0	0	-0.102	-0.188
	2	0.394	0	0	0	0.397
	3	0	0	0	-0.205	-0.309
	4	0	0	0	0.05	-0.309
	5	0	0	0	0	-0.224
	Mean	0.0788	0	0	-0.0514	-0.1266
	Variance	0.0248378	0	0	0.00834384	0.0707906
THCA	1	-0.213	-0.213	0	-0.213	0.158
	2	0.77	0	0	-0.289	0.559
	3	0.418	0.418	0.418	0.418	0.214
	4	0	1	0	0.516	-0.194
	5	-0.289	-0.194	-0.194	0.083	0.559
	Mean	0.1372	0.2022	0.0448	0.103	0.2592
	Variance	0.160479	0.210661	0.040465	0.104743	0.079487
HNSC	1	0	0	0	0	0
	2	0	0	0	0	0
	3	0	0	0	0	0
	4	0	0	0	0	0
	5	0	0	-0.111	0	0
	Mean	0	0	-0.0222	0	0
	Variance	0	0	0.00197136	0	0
KIRP	1	-0.395	0	-0.1	-0.06	0.1
	2	0.478	0	0.158	-0.158	-0.316
	3	0.35	0.55	0.158	0.316	0.158
	4	0	0	0.316	0.158	-0.158
	5	0	0	-0.478	0.189	-0.598
	Mean	0.0866	0.11	0.0108	0.089	-0.1628
	Variance	0.0939022	0.0484	0.077537	0.0299	0.0769738
LUSC	1	0	0	0	0	0
	2	0	0	0	0	0
	3	0	0	0	0.655	0
	4	0	0	0	0	0
	5	0	0	0	-0.218	0
	Mean	0	0	0	0.0874	0
	Variance	0	0	0	0.087671	0
LIHC	1	-0.143	0	0	0	0
	2	0	0	0	0	0
	3	0	0	0	-0.218	0
	4	-0.293	0	0	0	0.149
	5	0	0	0	0.655	0
	Mean	-0.0872	0	0	0.0874	0.0298
	Variance	0.0136558	0	0	0.087671	0.00355216
COAD	1	0.218	0	0	0	0.333
	2	-0.258	0	0.149	0.467	0.447
	3	0.378	0	0.258	0.258	0.258
	4	0.645	0	0.645	0.471	1
	5	0.471	0	0.645	-0.258	-0.167
	Mean	0.2908	0	0.3394	0.1876	0.3742
	Variance	0.094403	0	0.0689706	0.0794178	0.141005
UCEC	1	0.645	0	0.471	0.471	0.471
	2	1	0	0	0.091	0.645
	3	0	0	0	0	-0.091
	4	-0.167	0	-0.167	-0.258	-0.258
	5	0	0	0	0.316	0.316
	Mean	0.2956	0	0.0608	0.124	0.2166
	Variance	0.201403	0	0.0462494	0.0639324	0.115598

## Sheet: Supplementary Table S5
Supplementary Table S5: The Precision values of XGBoost、SVM、RF、KNN and NB obtained in each fold on all datasets.
Cohort	Fold	XGBoost	SVM	RF	KNN	NB
KIRC	1	0.778	0.875	0.75	0.8	0.909
	2	0.647	0.706	0.579	0.909	0.75
	3	0.625	0.6	0.571	0.769	0.611
	4	0.8	0.786	0.733	0.7	0.833
	5	0.667	0.531	0.583	0.857	0.632
	Mean	0.7034	0.6996	0.6432	0.807	0.747
	Variance	0.00510984	0.0153234	0.00648576	0.0051692	0.013074
BRCA	1	0	0	0	0	0
	2	1	0	0	0	0.667
	3	0	0	0	0	0
	4	0	0	0	0.25	0
	5	0	0	0	0	0
	Mean	0.2	0	0	0.05	0.1334
	Variance	0.16	0	0	0.01	0.0711822
THCA	1	0	0	0	0	0.5
	2	1	0	0	0	0.5
	3	1	1	1	1	0.5
	4	0	1	0	0.333	0
	5	0	0	0	0.333	0.5
	Mean	0.4	0.4	0.2	0.3332	0.4
	Variance	0.24	0.24	0.16	0.133333	0.04
HNSC	1	0.9	0.9	0.9	0.9	0.9
	2	0.9	0.9	0.9	0.9	0.9
	3	0.8	0.8	0.8	0.8	0.8
	4	0.7	0.7	0.7	0.7	0.7
	5	0.9	0.9	0.889	0.9	0.9
	Mean	0.84	0.84	0.8378	0.84	0.84
	Variance	0.0064	0.0064	0.00615536	0.0064	0.0064
KIRP	1	0.375	0.444	0.4	0.429	0.5
	2	0.571	0.444	0.5	0.333	0.333
	3	0.75	0.8	0.667	1	0.667
	4	0.333	0.333	0.5	0.4	0.25
	5	0	0	0.6	1	0.5
	Mean	0.4058	0.4042	0.5334	0.6324	0.45
	Variance	0.0633374	0.0656546	0.00846224	0.0910562	0.0211556
LUSC	1	0	0	0	0	0
	2	0	0	0	0	0
	3	0	0	0	1	0
	4	0	0	0	0	0
	5	0	0	0	0	0
	Mean	0	0	0	0.2	0
	Variance	0	0	0	0.16	0
LIHC	1	0	0	0	0	0
	2	0	0	0	0	0
	3	0	0	0	0	0
	4	0	0	0	0	0.5
	5	0	0	0	1	0
	Mean	0	0	0	0.2	0.1
	Variance	0	0	0	0.16	0.04
COAD	1	1	0	0	0	1
	2	0.25	0	0.5	0.667	0.5
	3	1	0	0.667	0.667	0.667
	4	0.5	0	0.5	0.333	1
	5	0.333	0	0.5	0	0
	Mean	0.6166	0	0.4334	0.3334	0.6334
	Variance	0.104482	0	0.0511422	0.0889778	0.137782
UCEC	1	0.5	0	0.333	0.333	0.333
	2	1	0	0	0.333	1
	3	0	0	0	0	0.5
	4	0	0	0	0	0
	5	0	0	0	1	1
	Mean	0.3	0	0.0666	0.3332	0.5666
	Variance	0.16	0	0.0177422	0.133333	0.151142

## Sheet: Supplementary Table S6
Supplementary Table S6: The Recall values of XGBoost、SVM、RF、KNN and NB obtained in each fold on all datasets.
Cohort	Fold	XGBoost	SVM	RF	KNN	NB
KIRC	1	0.667	0.667	0.571	0.381	0.476
	2	0.733	0.8	0.733	0.667	0.8
	3	0.882	0.706	0.706	0.588	0.647
	4	0.632	0.579	0.579	0.368	0.526
	5	0.824	1	0.824	0.706	0.706
	Mean	0.7476	0.7504	0.6826	0.542	0.631
	Variance	0.00879464	0.020613	0.00925384	0.0201668	0.0138984
BRCA	1	0	0	0	0	0
	2	0.2	0	0	0	0.4
	3	0	0	0	0	0
	4	0	0	0	0.25	0
	5	0	0	0	0	0
	Mean	0.04	0	0	0.05	0.08
	Variance	0.0064	0	0	0.01	0.0256
THCA	1	0	0	0	0	0.25
	2	0.667	0	0	0	1
	3	0.25	0.25	0.25	0.25	0.5
	4	0	1	0	1	0
	5	0	0	0	0.333	1
	Mean	0.1834	0.25	0.05	0.3166	0.55
	Variance	0.0678422	0.15	0.01	0.134442	0.16
HNSC	1	1	1	1	1	1
	2	1	1	1	1	1
	3	1	1	1	1	1
	4	1	1	1	1	1
	5	1	1	0.889	1	1
	Mean	1	1	0.9778	1	1
	Variance	0	0	0.00197136	0	0
KIRP	1	0.75	1	0.5	0.75	0.5
	2	1	1	0.75	0.25	0.5
	3	0.6	0.8	0.4	0.2	0.4
	4	1	1	0.667	0.667	0.333
	5	0	0	0.429	0.143	0.286
	Mean	0.67	0.76	0.5492	0.402	0.4038
	Variance	0.1356	0.1504	0.0186654	0.0644636	0.00748256
LUSC	1	0	0	0	0	0
	2	0	0	0	0	0
	3	0	0	0	0.5	0
	4	0	0	0	0	0
	5	0	0	0	0	0
	Mean	0	0	0	0.1	0
	Variance	0	0	0	0.04	0
LIHC	1	0	0	0	0	0
	2	0	0	0	0	0
	3	0	0	0	0	0
	4	0	0	0	0	0.333
	5	0	0	0	0.5	0
	Mean	0	0	0	0.1	0.0666
	Variance	0	0	0	0.04	0.0177422
COAD	1	0.167	0	0	0	0.333
	2	0.333	0	0.333	0.667	1
	3	0.25	0	0.5	0.5	0.5
	4	1	0	1	1	1
	5	1	0	1	0	0
	Mean	0.55	0	0.5666	0.4334	0.5666
	Variance	0.137756	0	0.151142	0.151142	0.151142
UCEC	1	1	0	1	1	1
	2	1	0	0	0.5	0.5
	3	0	0	0	0	0.25
	4	0	0	0	0	0
	5	0	0	0	0.25	0.25
	Mean	0.4	0	0.2	0.35	0.4
	Variance	0.24	0	0.16	0.14	0.115

## Sheet: Supplementary Table S7
Supplementary Table S7: All enriched pathways in GO molecular function, biological processes, and cell compartment identified using key CpG sites of KIRC dataset (threshold: FDR <0.05).
	ONTOLOGY	TERM	N	DE	P.DE	FDR
GO:0000122	BP	negative regulation of transcription by RNA polymerase II	828	671	1.12489e-07	7.16673e-05
GO:0000166	MF	nucleotide binding	2087	1571.5	0.000148365	0.0253426
GO:0000902	BP	cell morphogenesis	1027	824	7.84631e-07	0.000302123
GO:0000904	BP	cell morphogenesis involved in differentiation	740	608	2.32235e-07	0.000107672
GO:0000976	MF	transcription regulatory region sequence-specific DNA binding	802	648.5	5.90858e-07	0.000231433
GO:0000977	MF	RNA polymerase II transcription regulatory region sequence-specific DNA binding	751	608.5	8.15351e-07	0.000308719
GO:0000978	MF	RNA polymerase II cis-regulatory region sequence-specific DNA binding	535	433.5	6.45214e-05	0.013699
GO:0000981	MF	DNA-binding transcription factor activity, RNA polymerase II-specific	1565	1212.33	3.28672e-07	0.000138274
GO:0000987	MF	cis-regulatory region sequence-specific DNA binding	552	448	3.24768e-05	0.00752864
GO:0001067	MF	regulatory region nucleic acid binding	803	649.5	5.49134e-07	0.000219802
GO:0001217	MF	DNA-binding transcription repressor activity	240	203	0.000131467	0.0231412
GO:0001227	MF	DNA-binding transcription repressor activity, RNA polymerase II-specific	240	203	0.000131467	0.0231412
GO:0001501	BP	skeletal system development	514	415.5	0.000129702	0.0231412
GO:0001655	BP	urogenital system development	330	274.333	4.45221e-05	0.00956487
GO:0001822	BP	kidney development	278	233.833	4.43107e-05	0.00956487
GO:0002009	BP	morphogenesis of an epithelium	537	433	9.8087e-05	0.0192098
GO:0003690	MF	double-stranded DNA binding	943	747	1.39113e-05	0.00355099
GO:0003700	MF	DNA-binding transcription factor activity	1657	1286.33	7.26676e-08	5.32536e-05
GO:0003712	MF	transcription coregulator activity	554	443.533	8.02795e-05	0.0165799
GO:0005515	MF	protein binding	11501	8302.42	1.05753e-05	0.00292988
GO:0005524	MF	ATP binding	1452	1122.67	7.71752e-06	0.00221932
GO:0006351	BP	transcription, DNA-templated	3504	2638.7	3.04889e-08	2.88766e-05
GO:0006355	BP	regulation of transcription, DNA-templated	3339	2520.2	2.5564e-08	2.88766e-05
GO:0006357	BP	regulation of transcription by RNA polymerase II	2541	1946.53	1.23378e-08	2.62556e-05
GO:0006366	BP	transcription by RNA polymerase II	2675	2042.03	2.08029e-08	2.62556e-05
GO:0007167	BP	enzyme linked receptor protein signaling pathway	1037	807.917	1.59148e-05	0.0038463
GO:0007178	BP	transmembrane receptor protein serine/threonine kinase signaling pathway	345	278.833	0.000251917	0.0394694
GO:0007275	BP	multicellular organism development	5402	3954.97	8.24542e-05	0.0168756
GO:0007399	BP	nervous system development	2353	1854.64	8.25756e-12	1.87595e-07
GO:0007409	BP	axonogenesis	467	387	3.29236e-05	0.00755513
GO:0007411	BP	axon guidance	276	237.5	1.50616e-05	0.00368999
GO:0007417	BP	central nervous system development	996	804	1.73703e-08	2.62556e-05
GO:0007420	BP	brain development	722	588	2.19893e-07	0.000104074
GO:0008092	MF	cytoskeletal protein binding	967	755.667	0.000130972	0.0231412
GO:0008134	MF	transcription factor binding	652	533	1.54055e-07	8.74955e-05
GO:0009058	BP	biosynthetic process	6079	4447.73	4.22219e-06	0.00139014
GO:0009059	BP	macromolecule biosynthetic process	4905	3621.23	9.90167e-07	0.000357057
GO:0009653	BP	anatomical structure morphogenesis	2710	2078.67	1.24259e-08	2.62556e-05
GO:0009719	BP	response to endogenous stimulus	1693	1291.42	1.08607e-06	0.000385522
GO:0009790	BP	embryo development	1014	814.167	1.49311e-07	8.69756e-05
GO:0009887	BP	animal organ morphogenesis	1064	834.583	9.45194e-05	0.0186721
GO:0009889	BP	regulation of biosynthetic process	4176	3090.45	7.84693e-06	0.00222833
GO:0009891	BP	positive regulation of biosynthetic process	1984	1522.33	2.66337e-07	0.000121013
GO:0009893	BP	positive regulation of metabolic process	3721	2779.67	1.9636e-07	9.98317e-05
GO:0010033	BP	response to organic substance	3283	2405.92	0.000161733	0.0272167
GO:0010556	BP	regulation of macromolecule biosynthetic process	3957	2935.95	6.65165e-06	0.00201483
GO:0010557	BP	positive regulation of macromolecule biosynthetic process	1854	1434.17	7.67874e-08	5.45143e-05
GO:0010604	BP	positive regulation of macromolecule metabolic process	3463	2593.33	1.91909e-07	9.98317e-05
GO:0010628	BP	positive regulation of gene expression	2245	1706.08	1.78507e-07	9.89105e-05
GO:0010646	BP	regulation of cell communication	3568	2635	0.000305213	0.0471689
GO:0010761	BP	fibroblast migration	39	38.5	0.000205288	0.0340419
GO:0016043	BP	cellular component organization	6168	4575.44	9.46503e-09	2.62556e-05
GO:0016773	MF	phosphotransferase activity, alcohol group as acceptor	686	546.5	7.3814e-05	0.0155269
GO:0017076	MF	purine nucleotide binding	1857	1406.17	0.000101418	0.0196925
GO:0018130	BP	heterocycle biosynthetic process	4079	3060.53	9.90212e-09	2.62556e-05
GO:0019219	BP	regulation of nucleobase-containing compound metabolic process	3901	2927.2	2.90926e-08	2.88766e-05
GO:0019438	BP	aromatic compound biosynthetic process	4089	3065.03	1.35947e-08	2.62556e-05
GO:0019899	MF	enzyme binding	2189	1666.37	6.86072e-06	0.00205081
GO:0022008	BP	neurogenesis	1609	1274	1.73977e-08	2.62556e-05
GO:0023051	BP	regulation of signaling	3610	2668.5	0.000214196	0.0351276
GO:0030054	CC	cell junction	1850	1451.51	3.88181e-08	3.26618e-05
GO:0030182	BP	neuron differentiation	1352	1074	2.08138e-07	0.000102793
GO:0030554	MF	adenyl nucleotide binding	1520	1173.5	7.23389e-06	0.00210692
GO:0030900	BP	forebrain development	377	309	0.000238125	0.0380967
GO:0031323	BP	regulation of cellular metabolic process	6096	4463.87	4.36862e-06	0.00141781
GO:0031325	BP	positive regulation of cellular metabolic process	3268	2457	2.13491e-07	0.000103193
GO:0031326	BP	regulation of cellular biosynthetic process	4096	3024.95	3.39548e-05	0.00763748
GO:0031328	BP	positive regulation of cellular biosynthetic process	1951	1497.83	8.32555e-07	0.000310065
GO:0032502	BP	developmental process	6377	4637.8	0.000117445	0.0222342
GO:0032553	MF	ribonucleotide binding	1860	1407.83	0.0001267	0.023027
GO:0032555	MF	purine ribonucleotide binding	1844	1396.83	0.000115318	0.0220151
GO:0032559	MF	adenyl ribonucleotide binding	1509	1165.17	7.1047e-06	0.00209616
GO:0032774	BP	RNA biosynthetic process	3563	2682.53	2.22233e-08	2.6572e-05
GO:0032989	BP	cellular component morphogenesis	778	626	3.17904e-05	0.0074455
GO:0032990	BP	cell part morphogenesis	680	552.5	4.17563e-05	0.00920989
GO:0034329	BP	cell junction assembly	407	342.5	5.51488e-07	0.000219802
GO:0034330	BP	cell junction organization	660	536.273	1.96689e-06	0.000677029
GO:0034645	BP	cellular macromolecule biosynthetic process	4759	3519.9	9.51242e-07	0.000348554
GO:0034654	BP	nucleobase-containing compound biosynthetic process	4017	3018.03	6.70075e-09	2.62556e-05
GO:0035639	MF	purine ribonucleoside triphosphate binding	1780	1349.33	0.000105159	0.0202459
GO:0043167	MF	ion binding	6059	4429.88	0.000124418	0.0229904
GO:0043168	MF	anion binding	2729	2055.9	3.86455e-06	0.0012911
GO:0043565	MF	sequence-specific DNA binding	1091	866	3.09365e-07	0.000135157
GO:0044249	BP	cellular biosynthetic process	5896	4312.23	1.27641e-05	0.00334609
GO:0044260	BP	cellular macromolecule metabolic process	8079	5863.15	1.23192e-05	0.00333174
GO:0044271	BP	cellular nitrogen compound biosynthetic process	4752	3504.07	4.92997e-06	0.00153423
GO:0045202	CC	synapse	1165	914	8.64878e-05	0.0175431
GO:0045664	BP	regulation of neuron differentiation	647	518.5	0.00021764	0.0353167
GO:0045892	BP	negative regulation of transcription, DNA-templated	1186	937.333	1.08216e-07	7.16673e-05
GO:0045893	BP	positive regulation of transcription, DNA-templated	1512	1189.5	1.63322e-08	2.62556e-05
GO:0045934	BP	negative regulation of nucleobase-containing compound metabolic process	1415	1102	2.97846e-07	0.000132676
GO:0045935	BP	positive regulation of nucleobase-containing compound metabolic process	1840	1429.67	4.41886e-08	3.46164e-05
GO:0045944	BP	positive regulation of transcription by RNA polymerase II	1185	938	1.1512e-07	7.16673e-05
GO:0046660	BP	female sex differentiation	113	98.5	0.000214928	0.0351276
GO:0048468	BP	cell development	2164	1645.75	0.000150156	0.0254571
GO:0048518	BP	positive regulation of biological process	6002	4423.58	4.33278e-08	3.46164e-05
GO:0048522	BP	positive regulation of cellular process	5474	4043.92	5.11972e-07	0.000211472
GO:0048565	BP	digestive tract development	134	118.5	9.01471e-05	0.0181235
GO:0048568	BP	embryonic organ development	427	355	1.25545e-05	0.00334609
GO:0048598	BP	embryonic morphogenesis	584	480.667	1.2523e-06	0.00043769
GO:0048666	BP	neuron development	1097	864.5	7.79348e-05	0.0162433
GO:0048667	BP	cell morphogenesis involved in neuron differentiation	579	479.5	3.83792e-06	0.0012911
GO:0048699	BP	generation of neurons	1510	1198	3.30483e-08	2.88766e-05
GO:0048729	BP	tissue morphogenesis	668	530.5	0.000249371	0.0393418
GO:0048731	BP	system development	4834	3549.8	9.27645e-05	0.0184862
GO:0048812	BP	neuron projection morphogenesis	643	526	1.51056e-05	0.00368999
GO:0048856	BP	anatomical structure development	5888	4296.3	0.000124475	0.0229904
GO:0048858	BP	cell projection morphogenesis	661	540	1.41009e-05	0.00355938
GO:0050767	BP	regulation of neurogenesis	813	645.5	0.000126169	0.023027
GO:0051128	BP	regulation of cellular component organization	2318	1764.33	4.84337e-06	0.00152822
GO:0051130	BP	positive regulation of cellular component organization	1169	898.833	0.000248079	0.0393418
GO:0051171	BP	regulation of nitrogen compound metabolic process	5734	4195.03	1.503e-05	0.00368999
GO:0051173	BP	positive regulation of nitrogen compound metabolic process	3123	2358	4.90094e-08	3.71132e-05
GO:0051239	BP	regulation of multicellular organismal process	3216	2384.5	3.32805e-05	0.00756067
GO:0051252	BP	regulation of RNA metabolic process	3648	2750.87	8.84956e-09	2.62556e-05
GO:0051253	BP	negative regulation of RNA metabolic process	1323	1038.17	1.16722e-07	7.16673e-05
GO:0051254	BP	positive regulation of RNA metabolic process	1682	1314	3.08423e-08	2.88766e-05
GO:0051960	BP	regulation of nervous system development	921	732.5	2.03383e-05	0.00486363
GO:0055123	BP	digestive system development	146	127.5	0.000144695	0.0249029
GO:0060322	BP	head development	764	622	1.15835e-07	7.16673e-05
GO:0060562	BP	epithelial tube morphogenesis	322	268	0.000132422	0.0231412
GO:0065008	BP	regulation of biological quality	3994	2948.85	4.46288e-05	0.00956487
GO:0070848	BP	response to growth factor	728	569.583	0.000123965	0.0229904
GO:0071310	BP	cellular response to organic substance	2714	2015.5	1.11125e-05	0.0030416
GO:0071363	BP	cellular response to growth factor stimulus	699	547.583	0.000139062	0.024116
GO:0071495	BP	cellular response to endogenous stimulus	1432	1106.17	1.97747e-07	9.98317e-05
GO:0071840	BP	cellular component organization or biogenesis	6353	4699.97	2.00403e-08	2.62556e-05
GO:0072001	BP	renal system development	293	247.833	1.28141e-05	0.00334609
GO:0072073	BP	kidney epithelium development	140	122	0.000269823	0.0419852
GO:0080090	BP	regulation of primary metabolic process	5906	4314.73	2.94368e-05	0.00696609
GO:0097367	MF	carbohydrate derivative binding	2182	1641.83	4.03684e-05	0.00899108
GO:0097485	BP	neuron projection guidance	277	238.5	1.34715e-05	0.0034778
GO:0097659	BP	nucleic acid-templated transcription	3550	2671.53	3.3003e-08	2.88766e-05
GO:0120039	BP	plasma membrane bounded cell projection morphogenesis	657	538	8.3553e-06	0.0023434
GO:0140110	MF	transcription regulator activity	2001	1553.87	4.1651e-09	2.62556e-05
GO:1901265	MF	nucleoside phosphate binding	2088	1571.5	0.000170731	0.0285196
GO:1901362	BP	organic cyclic compound biosynthetic process	4236	3170.03	9.50776e-09	2.62556e-05
GO:1901576	BP	organic substance biosynthetic process	5982	4378.9	5.08544e-06	0.00156123
GO:1902679	BP	negative regulation of RNA biosynthetic process	1236	973.167	1.44995e-07	8.66842e-05
GO:1902680	BP	positive regulation of RNA biosynthetic process	1598	1254.5	1.31689e-08	2.62556e-05
GO:1903506	BP	regulation of nucleic acid-templated transcription	3397	2562.03	2.7458e-08	2.88766e-05
GO:1903507	BP	negative regulation of nucleic acid-templated transcription	1234	971.167	1.83347e-07	9.91732e-05
GO:1903508	BP	positive regulation of nucleic acid-templated transcription	1597	1253.5	1.45971e-08	2.62556e-05
GO:1990837	MF	sequence-specific double-stranded DNA binding	851	686.5	3.19831e-07	0.000137093
GO:2000112	BP	regulation of cellular macromolecule biosynthetic process	3825	2844.12	4.65091e-06	0.00148816
GO:2000113	BP	negative regulation of cellular macromolecule biosynthetic process	1452	1101.58	0.000224404	0.0361561
GO:2001141	BP	regulation of RNA biosynthetic process	3402	2567.03	1.99583e-08	2.62556e-05
Ontology codes are BP = biological process, CC = cellular component, MF = molecular function. N is number of genes in the GO term, DE is the number of genes that are differentially methylated, P.DE is the p-value for over-representation of the GO term, and FDR is the False discovery rate q value.

## Sheet: Supplementary Table S8
Supplementary Table S8: All enriched pathways in GO molecular function, biological processes, and cell compartment identified using key CpG sites of BRCA dataset (threshold: FDR <0.05).
ONTOLOGY	TERM	N	DE	P.DE	FDR
BP	negative regulation of transcription by RNA polymerase II	828	671	1.78241e-07	0.000101232
MF	nucleotide binding	2087	1575	0.000125826	0.0223322
BP	cell morphogenesis	1027	827	4.22171e-07	0.000191817
BP	cell morphogenesis involved in differentiation	740	611	8.6369e-08	5.77097e-05
MF	transcription regulatory region sequence-specific DNA binding	802	648.5	8.95179e-07	0.000338945
MF	RNA polymerase II transcription regulatory region sequence-specific DNA binding	751	608.5	1.21103e-06	0.0004367
MF	RNA polymerase II cis-regulatory region sequence-specific DNA binding	535	433.5	8.84021e-05	0.0170197
MF	DNA-binding transcription factor activity, RNA polymerase II-specific	1565	1212.83	1.10348e-06	0.000404338
MF	cis-regulatory region sequence-specific DNA binding	552	448	4.58247e-05	0.0101072
MF	regulatory region nucleic acid binding	803	649.5	8.33167e-07	0.000320812
MF	DNA-binding transcription repressor activity	240	203	0.000156897	0.0264029
MF	DNA-binding transcription repressor activity, RNA polymerase II-specific	240	203	0.000156897	0.0264029
BP	skeletal system development	514	415.5	0.000169608	0.0279214
BP	urogenital system development	330	274.333	5.57384e-05	0.0116718
BP	kidney development	278	233.833	5.87538e-05	0.0121343
BP	morphogenesis of an epithelium	537	433	0.000131852	0.0232202
MF	double-stranded DNA binding	943	748	1.52808e-05	0.00377337
MF	DNA-binding transcription factor activity	1657	1286.83	1.48236e-07	8.63496e-05
MF	transcription coregulator activity	554	443.533	0.000111525	0.0201082
MF	protein kinase activity	583	465.167	0.000318889	0.0476613
MF	protein binding	11501	8323.58	7.66992e-06	0.00217807
MF	ATP binding	1452	1125.17	5.981e-06	0.00178785
BP	transcription, DNA-templated	3504	2639.7	7.71288e-08	5.47566e-05
BP	regulation of transcription, DNA-templated	3339	2521.7	6.2398e-08	5.27194e-05
BP	regulation of transcription by RNA polymerase II	2541	1948.53	1.95236e-08	2.82537e-05
BP	transcription by RNA polymerase II	2675	2044.53	3.41368e-08	4.08168e-05
BP	enzyme linked receptor protein signaling pathway	1037	810.417	9.1574e-06	0.00250648
BP	transmembrane receptor protein serine/threonine kinase signaling pathway	345	278.833	0.00031252	0.0473322
BP	multicellular organism development	5402	3965.47	5.60006e-05	0.0116718
BP	nervous system development	2353	1861.14	2.19549e-12	4.98772e-08
BP	axonogenesis	467	390	6.6148e-06	0.0019266
BP	axon guidance	276	237.5	1.81899e-05	0.00426019
BP	central nervous system development	996	808.5	5.3625e-09	2.8176e-05
BP	brain development	722	590.5	1.33057e-07	8.39667e-05
MF	cytoskeletal protein binding	967	756.667	0.000145185	0.0249872
MF	transcription factor binding	652	534	1.43019e-07	8.55028e-05
MF	drug binding	1699	1286.67	0.00030196	0.0463509
BP	biosynthetic process	6079	4456.9	4.9342e-06	0.00155688
BP	macromolecule biosynthetic process	4905	3627.4	1.5128e-06	0.000536975
BP	anatomical structure morphogenesis	2710	2084.67	7.08528e-09	2.8176e-05
BP	response to endogenous stimulus	1693	1291.92	3.72498e-06	0.00124447
BP	embryo development	1014	814.167	2.46422e-07	0.000127232
BP	animal organ morphogenesis	1064	835.583	0.000105987	0.0194179
BP	regulation of biosynthetic process	4176	3093.95	1.51621e-05	0.00377337
BP	positive regulation of biosynthetic process	1984	1525.83	2.58946e-07	0.000128183
BP	positive regulation of metabolic process	3721	2783.67	6.77372e-07	0.000274795
BP	response to organic substance	3283	2409.92	0.000194869	0.0316217
BP	regulation of macromolecule biosynthetic process	3957	2939.45	1.01474e-05	0.00274438
BP	positive regulation of macromolecule biosynthetic process	1854	1437.67	6.99436e-08	5.27194e-05
BP	positive regulation of macromolecule metabolic process	3463	2597.33	6.11994e-07	0.000252787
BP	positive regulation of gene expression	2245	1709.08	1.9375e-07	0.000104801
BP	regulation of cell communication	3568	2640	0.000324345	0.0481599
BP	fibroblast migration	39	38.5	0.00021836	0.0349345
BP	regulation of cell morphogenesis involved in differentiation	297	248	0.000214604	0.0345772
MF	ion transmembrane transporter activity	861	663.5	0.000220312	0.0350004
MF	inorganic molecular entity transmembrane transporter activity	809	623	0.00031464	0.0473376
BP	cellular component organization	6168	4586.44	7.4415e-09	2.8176e-05
MF	phosphotransferase activity, alcohol group as acceptor	686	548	4.80747e-05	0.0104049
MF	purine nucleotide binding	1857	1409.17	9.67577e-05	0.0181665
BP	heterocycle biosynthetic process	4079	3064.03	1.61233e-08	2.82537e-05
BP	regulation of nucleobase-containing compound metabolic process	3901	2929.2	6.56254e-08	5.27194e-05
BP	aromatic compound biosynthetic process	4089	3068.53	2.70758e-08	3.4384e-05
MF	enzyme binding	2189	1667.37	1.25009e-05	0.00326431
BP	neurogenesis	1609	1280	4.68706e-09	2.8176e-05
BP	regulation of signaling	3610	2673.5	0.000230006	0.0362867
CC	cell junction	1850	1453.51	4.48494e-08	5.08195e-05
BP	neuron differentiation	1352	1079	7.01762e-08	5.27194e-05
MF	adenyl nucleotide binding	1520	1176	5.7986e-06	0.00175643
BP	forebrain development	377	309	0.000296282	0.0457886
BP	neuron projection development	966	765.5	0.000152611	0.0260678
BP	regulation of cellular metabolic process	6096	4469.87	8.40387e-06	0.00235703
BP	positive regulation of cellular metabolic process	3268	2461	4.66132e-07	0.000207639
BP	regulation of cellular biosynthetic process	4096	3028.45	5.0655e-05	0.0108564
BP	positive regulation of cellular biosynthetic process	1951	1501.33	3.48253e-07	0.000164825
BP	developmental process	6377	4651.3	6.84652e-05	0.0138874
MF	ribonucleotide binding	1860	1410.83	0.000121276	0.0216942
MF	purine ribonucleotide binding	1844	1399.83	0.000109935	0.0199801
MF	adenyl ribonucleotide binding	1509	1167.67	7.4631e-06	0.00214616
BP	RNA biosynthetic process	3563	2683.53	5.76804e-08	5.24153e-05
BP	cellular component morphogenesis	778	629	1.24506e-05	0.00326431
BP	cell part morphogenesis	680	555.5	1.48512e-05	0.00374876
BP	cell junction assembly	407	342.5	7.33545e-07	0.000292363
BP	cell junction organization	660	537.273	1.82188e-06	0.000617754
BP	cellular macromolecule biosynthetic process	4759	3526.07	1.05447e-06	0.000392713
BP	nucleobase-containing compound biosynthetic process	4017	3021.53	1.32752e-08	2.82537e-05
MF	purine ribonucleoside triphosphate binding	1780	1352.33	9.76297e-05	0.0181799
MF	ion binding	6059	4442.38	7.96297e-05	0.0158687
MF	anion binding	2729	2058.9	5.41552e-06	0.00168534
MF	sequence-specific DNA binding	1091	866	5.16959e-07	0.00022159
BP	cellular biosynthetic process	5896	4321.4	1.38362e-05	0.00357193
BP	cellular macromolecule metabolic process	8079	5873.82	1.92753e-05	0.00446834
BP	cellular nitrogen compound biosynthetic process	4752	3510.23	6.5754e-06	0.0019266
CC	synapse	1165	916	7.56027e-05	0.0151995
BP	regulation of neuron differentiation	647	520.5	0.000139638	0.0244022
BP	negative regulation of transcription, DNA-templated	1186	937.333	1.92072e-07	0.000104801
BP	positive regulation of transcription, DNA-templated	1512	1191	1.6909e-08	2.82537e-05
BP	negative regulation of nucleobase-containing compound metabolic process	1415	1102	5.4907e-07	0.000230996
BP	positive regulation of nucleobase-containing compound metabolic process	1840	1431.67	5.30851e-08	5.24153e-05
BP	positive regulation of transcription by RNA polymerase II	1185	939.5	1.42898e-07	8.55028e-05
BP	female sex differentiation	113	98.5	0.000243603	0.0381668
BP	cell development	2164	1654.75	4.22246e-05	0.0094976
BP	positive regulation of biological process	6002	4435.58	2.72432e-08	3.4384e-05
BP	positive regulation of cellular process	5474	4054.92	1.29914e-07	8.39667e-05
BP	digestive tract development	134	118.5	0.000102469	0.0189259
BP	embryonic organ development	427	355	1.63566e-05	0.00391147
BP	embryonic morphogenesis	584	480.667	1.74355e-06	0.00060015
BP	neuron development	1097	869.5	2.48582e-05	0.00564728
BP	cell morphogenesis involved in neuron differentiation	579	482.5	7.67087e-07	0.00030046
BP	generation of neurons	1510	1203	1.18228e-08	2.82537e-05
BP	tissue morphogenesis	668	530.5	0.000338077	0.0498729
BP	system development	4834	3559.8	6.2713e-05	0.0128353
BP	neuron projection morphogenesis	643	529	4.03717e-06	0.00131023
BP	anatomical structure development	5888	4308.8	8.41145e-05	0.0164734
BP	cell projection morphogenesis	661	543	3.84461e-06	0.00126582
BP	regulation of neurogenesis	813	647.5	9.07039e-05	0.0173161
BP	regulation of cellular component organization	2318	1767.83	5.55168e-06	0.00170436
BP	positive regulation of cellular component organization	1169	901.833	0.000174783	0.0285664
BP	regulation of nitrogen compound metabolic process	5734	4201.03	2.40986e-05	0.00553001
BP	positive regulation of nitrogen compound metabolic process	3123	2362	5.68167e-08	5.24153e-05
BP	regulation of multicellular organismal process	3216	2392.5	1.80923e-05	0.00426019
BP	regulation of RNA metabolic process	3648	2752.37	1.93348e-08	2.82537e-05
BP	negative regulation of RNA metabolic process	1323	1038.17	2.14593e-07	0.000113375
BP	positive regulation of RNA metabolic process	1682	1315.5	4.69764e-08	5.08195e-05
BP	regulation of nervous system development	921	734.5	1.47506e-05	0.00374876
BP	digestive system development	146	127.5	0.000165032	0.0275676
BP	regulation of cell development	943	738.25	0.000289698	0.0450778
BP	head development	764	624.5	7.19387e-08	5.27194e-05
BP	epithelial tube morphogenesis	322	268	0.000166578	0.0276227
BP	axon development	511	419.5	8.32995e-05	0.0164556
BP	regulation of biological quality	3994	2953.85	5.42256e-05	0.011513
BP	response to growth factor	728	571.083	8.66897e-05	0.0168326
BP	cellular response to organic substance	2714	2019.5	1.15038e-05	0.00307463
BP	cellular response to growth factor stimulus	699	549.083	9.61027e-05	0.0181665
BP	cellular response to endogenous stimulus	1432	1106.67	3.67146e-07	0.000170221
BP	cellular component organization or biogenesis	6353	4710.97	1.69559e-08	2.82537e-05
BP	renal system development	293	247.833	1.59328e-05	0.00389206
BP	kidney epithelium development	140	122	0.000304908	0.0464893
BP	regulation of primary metabolic process	5906	4320.73	4.80905e-05	0.0104049
MF	carbohydrate derivative binding	2182	1644.83	4.31202e-05	0.00960397
BP	neuron projection guidance	277	238.5	1.62908e-05	0.00391147
BP	nucleic acid-templated transcription	3550	2672.53	8.41681e-08	5.77097e-05
BP	plasma membrane bounded cell projection morphogenesis	657	541	1.53638e-06	0.000536975
MF	transcription regulator activity	2001	1554.37	7.4354e-09	2.8176e-05
MF	nucleoside phosphate binding	2088	1575	0.000144856	0.0249872
BP	organic cyclic compound biosynthetic process	4236	3173.53	1.98987e-08	2.82537e-05
BP	organic substance biosynthetic process	5982	4388.07	4.84619e-06	0.00155065
BP	negative regulation of RNA biosynthetic process	1236	973.167	2.59548e-07	0.000128183
BP	positive regulation of RNA biosynthetic process	1598	1256	1.42347e-08	2.82537e-05
BP	regulation of nucleic acid-templated transcription	3397	2563.53	6.78222e-08	5.27194e-05
BP	negative regulation of nucleic acid-templated transcription	1234	971.167	3.26071e-07	0.00015761
BP	positive regulation of nucleic acid-templated transcription	1597	1255	1.57654e-08	2.82537e-05
MF	sequence-specific double-stranded DNA binding	851	686.5	4.99305e-07	0.000218139
BP	regulation of cellular macromolecule biosynthetic process	3825	2847.62	8.54439e-06	0.00236721
BP	regulation of RNA biosynthetic process	3402	2568.53	4.989e-08	5.15183e-05
Ontology codes are BP = biological process, CC = cellular component, MF = molecular function. N is number of genes in the GO term, DE is the number of genes that are differentially methylated, P.DE is the p-value for over-representation of the GO term, and FDR is the False discovery rate q value.

## Sheet: Supplementary Table S9
Supplementary Table S9: All enriched pathways in GO molecular function, biological processes, and cell compartment identified using key CpG sites of THCA dataset (threshold: FDR <0.05).
	ONTOLOGY	TERM	N	DE	P.DE	FDR
GO:0000122	BP	negative regulation of transcription by RNA polymerase II	828	673	7.41253e-08	4.95288e-05
GO:0000166	MF	nucleotide binding	2087	1574	0.000151087	0.0260233
GO:0000902	BP	cell morphogenesis	1027	826	6.00173e-07	0.00022352
GO:0000904	BP	cell morphogenesis involved in differentiation	740	610	1.36904e-07	7.5858e-05
GO:0000976	MF	transcription regulatory region sequence-specific DNA binding	802	649.5	5.91038e-07	0.00022352
GO:0000977	MF	RNA polymerase II transcription regulatory region sequence-specific DNA binding	751	609.5	7.93137e-07	0.000290621
GO:0000978	MF	RNA polymerase II cis-regulatory region sequence-specific DNA binding	535	434.5	5.58707e-05	0.0113328
GO:0000981	MF	DNA-binding transcription factor activity, RNA polymerase II-specific	1565	1212.83	1.08131e-06	0.000383833
GO:0000987	MF	cis-regulatory region sequence-specific DNA binding	552	449	2.82499e-05	0.00635426
GO:0001067	MF	regulatory region nucleic acid binding	803	650.5	5.49397e-07	0.000211546
GO:0001217	MF	DNA-binding transcription repressor activity	240	203	0.000156357	0.0265084
GO:0001227	MF	DNA-binding transcription repressor activity, RNA polymerase II-specific	240	203	0.000156357	0.0265084
GO:0001501	BP	skeletal system development	514	415.5	0.000168425	0.0279291
GO:0001655	BP	urogenital system development	330	274.333	5.54429e-05	0.0113328
GO:0001822	BP	kidney development	278	233.833	5.84792e-05	0.0116538
GO:0002009	BP	morphogenesis of an epithelium	537	433	0.000130932	0.0236072
GO:0003690	MF	double-stranded DNA binding	943	749	1.00917e-05	0.00265491
GO:0003700	MF	DNA-binding transcription factor activity	1657	1286.83	1.4496e-07	7.84093e-05
GO:0003712	MF	transcription coregulator activity	554	443.533	0.000110586	0.0205925
GO:0004672	MF	protein kinase activity	583	465.167	0.000316678	0.0470215
GO:0005515	MF	protein binding	11501	8324.58	5.96934e-06	0.00180815
GO:0005524	MF	ATP binding	1452	1124.17	8.20226e-06	0.00230048
GO:0006351	BP	transcription, DNA-templated	3504	2643.7	3.18619e-08	2.93279e-05
GO:0006355	BP	regulation of transcription, DNA-templated	3339	2524.7	3.13424e-08	2.93279e-05
GO:0006357	BP	regulation of transcription by RNA polymerase II	2541	1950.53	1.12961e-08	1.67919e-05
GO:0006366	BP	transcription by RNA polymerase II	2675	2046.53	2.02108e-08	2.55082e-05
GO:0007167	BP	enzyme linked receptor protein signaling pathway	1037	810.417	9.01046e-06	0.00249634
GO:0007178	BP	transmembrane receptor protein serine/threonine kinase signaling pathway	345	278.833	0.000307034	0.0463516
GO:0007275	BP	multicellular organism development	5402	3967.47	3.96568e-05	0.00858022
GO:0007399	BP	nervous system development	2353	1863.14	1.05034e-12	2.38615e-08
GO:0007409	BP	axonogenesis	467	389	1.34025e-05	0.00334591
GO:0007411	BP	axon guidance	276	237.5	1.81242e-05	0.00424481
GO:0007417	BP	central nervous system development	996	809.5	3.38844e-09	1.67919e-05
GO:0007420	BP	brain development	722	590.5	1.31571e-07	7.47256e-05
GO:0008092	MF	cytoskeletal protein binding	967	756.667	0.000143374	0.0252493
GO:0008134	MF	transcription factor binding	652	535	8.64186e-08	5.60931e-05
GO:0009058	BP	biosynthetic process	6079	4459.4	2.66727e-06	0.000891105
GO:0009059	BP	macromolecule biosynthetic process	4905	3630.9	5.39617e-07	0.000211362
GO:0009653	BP	anatomical structure morphogenesis	2710	2084.67	6.85456e-09	1.67919e-05
GO:0009719	BP	response to endogenous stimulus	1693	1292.92	2.48574e-06	0.000842851
GO:0009790	BP	embryo development	1014	815.167	1.66826e-07	8.61355e-05
GO:0009887	BP	animal organ morphogenesis	1064	836.583	7.7417e-05	0.0149047
GO:0009889	BP	regulation of biosynthetic process	4176	3095.95	1.01437e-05	0.00265491
GO:0009891	BP	positive regulation of biosynthetic process	1984	1525.83	2.52924e-07	0.000124911
GO:0009893	BP	positive regulation of metabolic process	3721	2783.67	4.74228e-07	0.000189009
GO:0010033	BP	response to organic substance	3283	2409.92	0.000188078	0.0307393
GO:0010556	BP	regulation of macromolecule biosynthetic process	3957	2941.45	6.60411e-06	0.00197199
GO:0010557	BP	positive regulation of macromolecule biosynthetic process	1854	1437.67	6.8363e-08	4.89511e-05
GO:0010604	BP	positive regulation of macromolecule metabolic process	3463	2597.33	4.30579e-07	0.000181146
GO:0010628	BP	positive regulation of gene expression	2245	1709.08	1.88129e-07	9.49758e-05
GO:0010646	BP	regulation of cell communication	3568	2641	0.000269907	0.0417126
GO:0010761	BP	fibroblast migration	39	38.5	0.000218051	0.0346412
GO:0015075	MF	ion transmembrane transporter activity	861	663.5	0.000216991	0.0346412
GO:0015318	MF	inorganic molecular entity transmembrane transporter activity	809	623	0.000310126	0.0463516
GO:0016043	BP	cellular component organization	6168	4586.94	6.98144e-09	1.67919e-05
GO:0016773	MF	phosphotransferase activity, alcohol group as acceptor	686	548	4.76508e-05	0.0101171
GO:0017076	MF	purine nucleotide binding	1857	1408.17	0.000118341	0.0218575
GO:0018130	BP	heterocycle biosynthetic process	4079	3068.03	6.65196e-09	1.67919e-05
GO:0019219	BP	regulation of nucleobase-containing compound metabolic process	3901	2932.2	3.43555e-08	2.93279e-05
GO:0019438	BP	aromatic compound biosynthetic process	4089	3072.53	1.13695e-08	1.67919e-05
GO:0019899	MF	enzyme binding	2189	1667.37	1.2205e-05	0.00308082
GO:0022008	BP	neurogenesis	1609	1281	3.25341e-09	1.67919e-05
GO:0023051	BP	regulation of signaling	3610	2674.5	0.000190642	0.0309357
GO:0030054	CC	cell junction	1850	1454.51	3.27062e-08	2.93279e-05
GO:0030182	BP	neuron differentiation	1352	1079	6.91303e-08	4.89511e-05
GO:0030554	MF	adenyl nucleotide binding	1520	1175	7.91269e-06	0.00224701
GO:0030900	BP	forebrain development	377	309	0.000294684	0.045234
GO:0031175	BP	neuron projection development	966	765.5	0.000151205	0.0260233
GO:0031323	BP	regulation of cellular metabolic process	6096	4471.87	5.60285e-06	0.00172007
GO:0031325	BP	positive regulation of cellular metabolic process	3268	2461	4.50213e-07	0.000182642
GO:0031326	BP	regulation of cellular biosynthetic process	4096	3030.45	3.50561e-05	0.00773208
GO:0031328	BP	positive regulation of cellular biosynthetic process	1951	1501.33	3.40472e-07	0.000151664
GO:0032502	BP	developmental process	6377	4652.3	5.63947e-05	0.0113378
GO:0032553	MF	ribonucleotide binding	1860	1409.83	0.00014778	0.0258252
GO:0032555	MF	purine ribonucleotide binding	1844	1398.83	0.000134195	0.024005
GO:0032559	MF	adenyl ribonucleotide binding	1509	1166.67	1.01672e-05	0.00265491
GO:0032774	BP	RNA biosynthetic process	3563	2687.53	2.37207e-08	2.83624e-05
GO:0032989	BP	cellular component morphogenesis	778	628	1.95901e-05	0.0045413
GO:0032990	BP	cell part morphogenesis	680	554.5	2.38939e-05	0.00548304
GO:0034329	BP	cell junction assembly	407	343.5	3.96656e-07	0.000170023
GO:0034330	BP	cell junction organization	660	538.273	1.16711e-06	0.000407913
GO:0034645	BP	cellular macromolecule biosynthetic process	4759	3529.57	3.01386e-07	0.000139732
GO:0034654	BP	nucleobase-containing compound biosynthetic process	4017	3025.53	5.41539e-09	1.67919e-05
GO:0035639	MF	purine ribonucleoside triphosphate binding	1780	1351.33	0.000119947	0.0219755
GO:0043167	MF	ion binding	6059	4443.88	6.59755e-05	0.012921
GO:0043168	MF	anion binding	2729	2057.9	6.68381e-06	0.00197199
GO:0043412	BP	macromolecule modification	4263	3127.08	0.000310097	0.0463516
GO:0043565	MF	sequence-specific DNA binding	1091	867	3.59838e-07	0.000157208
GO:0044249	BP	cellular biosynthetic process	5896	4323.9	9.52301e-06	0.00260655
GO:0044260	BP	cellular macromolecule metabolic process	8079	5875.82	1.35572e-05	0.00334774
GO:0044271	BP	cellular nitrogen compound biosynthetic process	4752	3513.23	3.49304e-06	0.00113364
GO:0045202	CC	synapse	1165	917	5.55298e-05	0.0113328
GO:0045664	BP	regulation of neuron differentiation	647	520.5	0.000138604	0.0246
GO:0045892	BP	negative regulation of transcription, DNA-templated	1186	939.333	9.37811e-08	5.91811e-05
GO:0045893	BP	positive regulation of transcription, DNA-templated	1512	1192	1.18263e-08	1.67919e-05
GO:0045934	BP	negative regulation of nucleobase-containing compound metabolic process	1415	1104	2.94491e-07	0.00013938
GO:0045935	BP	positive regulation of nucleobase-containing compound metabolic process	1840	1432.67	3.87988e-08	3.03942e-05
GO:0045944	BP	positive regulation of transcription by RNA polymerase II	1185	940.5	9.88044e-08	6.06659e-05
GO:0046660	BP	female sex differentiation	113	98.5	0.000242509	0.037735
GO:0048468	BP	cell development	2164	1653.75	5.16024e-05	0.0108547
GO:0048518	BP	positive regulation of biological process	6002	4433.58	3.61468e-08	2.93279e-05
GO:0048522	BP	positive regulation of cellular process	5474	4052.92	4.40862e-07	0.0001821
GO:0048565	BP	digestive tract development	134	118.5	0.000102208	0.0191897
GO:0048568	BP	embryonic organ development	427	355	1.62819e-05	0.0038936
GO:0048598	BP	embryonic morphogenesis	584	481.667	1.08104e-06	0.000383833
GO:0048666	BP	neuron development	1097	869.5	2.45639e-05	0.00558042
GO:0048667	BP	cell morphogenesis involved in neuron differentiation	579	481.5	1.2438e-06	0.00042813
GO:0048699	BP	generation of neurons	1510	1204	8.21461e-09	1.67919e-05
GO:0048729	BP	tissue morphogenesis	668	530.5	0.000335383	0.0491563
GO:0048731	BP	system development	4834	3561.8	4.42673e-05	0.00948741
GO:0048812	BP	neuron projection morphogenesis	643	528	7.77164e-06	0.00223489
GO:0048856	BP	anatomical structure development	5888	4309.8	6.95398e-05	0.0135026
GO:0048858	BP	cell projection morphogenesis	661	542	7.37063e-06	0.00214674
GO:0050767	BP	regulation of neurogenesis	813	648.5	6.30778e-05	0.0124609
GO:0050793	BP	regulation of developmental process	2651	1974.33	0.000328518	0.0484627
GO:0051128	BP	regulation of cellular component organization	2318	1768.83	3.83828e-06	0.00122758
GO:0051130	BP	positive regulation of cellular component organization	1169	900.833	0.000224922	0.0354846
GO:0051171	BP	regulation of nitrogen compound metabolic process	5734	4203.03	1.68257e-05	0.00398173
GO:0051173	BP	positive regulation of nitrogen compound metabolic process	3123	2362	5.48133e-08	4.15083e-05
GO:0051239	BP	regulation of multicellular organismal process	3216	2394.5	1.16627e-05	0.00297699
GO:0051252	BP	regulation of RNA metabolic process	3648	2755.37	9.64026e-09	1.67919e-05
GO:0051253	BP	negative regulation of RNA metabolic process	1323	1040.17	1.09396e-07	6.54014e-05
GO:0051254	BP	positive regulation of RNA metabolic process	1682	1316.5	3.38525e-08	2.93279e-05
GO:0051960	BP	regulation of nervous system development	921	735.5	9.69484e-06	0.00262199
GO:0055123	BP	digestive system development	146	127.5	0.000164546	0.02769
GO:0060284	BP	regulation of cell development	943	739.25	0.000213366	0.0343777
GO:0060322	BP	head development	764	624.5	7.1106e-08	4.89511e-05
GO:0060562	BP	epithelial tube morphogenesis	322	268	0.000165949	0.0277209
GO:0061564	BP	axon development	511	418.5	0.000129839	0.0235975
GO:0065008	BP	regulation of biological quality	3994	2955.85	3.74521e-05	0.00818112
GO:0070848	BP	response to growth factor	728	571.083	8.5651e-05	0.0163514
GO:0071310	BP	cellular response to organic substance	2714	2019.5	1.0876e-05	0.00280774
GO:0071363	BP	cellular response to growth factor stimulus	699	549.083	9.40336e-05	0.0178021
GO:0071495	BP	cellular response to endogenous stimulus	1432	1107.67	2.65776e-07	0.000128466
GO:0071840	BP	cellular component organization or biogenesis	6353	4711.47	1.33471e-08	1.78364e-05
GO:0072001	BP	renal system development	293	247.833	1.58559e-05	0.00387327
GO:0072073	BP	kidney epithelium development	140	122	0.000304215	0.0463516
GO:0080090	BP	regulation of primary metabolic process	5906	4322.73	3.42459e-05	0.00762744
GO:0097367	MF	carbohydrate derivative binding	2182	1643.83	5.22395e-05	0.0108879
GO:0097485	BP	neuron projection guidance	277	238.5	1.62317e-05	0.0038936
GO:0097659	BP	nucleic acid-templated transcription	3550	2676.53	3.50414e-08	2.93279e-05
GO:0120039	BP	plasma membrane bounded cell projection morphogenesis	657	540	3.89057e-06	0.00122758
GO:0140110	MF	transcription regulator activity	2001	1554.37	7.23539e-09	1.67919e-05
GO:1901265	MF	nucleoside phosphate binding	2088	1574	0.000173646	0.0285861
GO:1901362	BP	organic cyclic compound biosynthetic process	4236	3177.53	8.36576e-09	1.67919e-05
GO:1901576	BP	organic substance biosynthetic process	5982	4390.57	3.17397e-06	0.00104502
GO:1902679	BP	negative regulation of RNA biosynthetic process	1236	975.167	1.299e-07	7.47256e-05
GO:1902680	BP	positive regulation of RNA biosynthetic process	1598	1257	1.00224e-08	1.67919e-05
GO:1903506	BP	regulation of nucleic acid-templated transcription	3397	2566.53	3.43042e-08	2.93279e-05
GO:1903507	BP	negative regulation of nucleic acid-templated transcription	1234	973.167	1.64265e-07	8.61355e-05
GO:1903508	BP	positive regulation of nucleic acid-templated transcription	1597	1256	1.11136e-08	1.67919e-05
GO:1990837	MF	sequence-specific double-stranded DNA binding	851	687.5	3.30196e-07	0.000150028
GO:2000112	BP	regulation of cellular macromolecule biosynthetic process	3825	2849.62	5.4856e-06	0.00170715
GO:2000113	BP	negative regulation of cellular macromolecule biosynthetic process	1452	1103.58	0.000227486	0.0356416
GO:2001141	BP	regulation of RNA biosynthetic process	3402	2571.53	2.50303e-08	2.84319e-05
Ontology codes are BP = biological process, CC = cellular component, MF = molecular function. N is number of genes in the GO term, DE is the number of genes that are differentially methylated, P.DE is the p-value for over-representation of the GO term, and FDR is the False discovery rate q value.

## Sheet: Supplementary Table S10
Supplementary Table S10: All enriched pathways in GO molecular function, biological processes, and cell compartment identified using key CpG sites of HNSC dataset (threshold: FDR <0.05).
	ONTOLOGY	TERM	N	DE	P.DE	FDR
GO:0000122	BP	negative regulation of transcription by RNA polymerase II	828	671	1.50806e-07	9.39976e-05
GO:0000166	MF	nucleotide binding	2087	1575.5	9.56896e-05	0.0181156
GO:0000902	BP	cell morphogenesis	1027	826	5.20469e-07	0.000197067
GO:0000904	BP	cell morphogenesis involved in differentiation	740	610	1.21584e-07	8.12398e-05
GO:0000976	MF	transcription regulatory region sequence-specific DNA binding	802	649.5	5.1426e-07	0.000197067
GO:0000977	MF	RNA polymerase II transcription regulatory region sequence-specific DNA binding	751	609.5	6.94711e-07	0.000254556
GO:0000978	MF	RNA polymerase II cis-regulatory region sequence-specific DNA binding	535	433.5	7.97998e-05	0.0153635
GO:0000981	MF	DNA-binding transcription factor activity, RNA polymerase II-specific	1565	1212.33	4.86448e-07	0.000193879
GO:0000987	MF	cis-regulatory region sequence-specific DNA binding	552	448	4.11777e-05	0.00917132
GO:0001067	MF	regulatory region nucleic acid binding	803	650.5	4.77847e-07	0.000193852
GO:0001217	MF	DNA-binding transcription repressor activity	240	203	0.000147928	0.0266717
GO:0001227	MF	DNA-binding transcription repressor activity, RNA polymerase II-specific	240	203	0.000147928	0.0266717
GO:0001501	BP	skeletal system development	514	415.5	0.000154769	0.0272561
GO:0001655	BP	urogenital system development	330	274.333	5.1566e-05	0.0111189
GO:0001822	BP	kidney development	278	233.833	5.47047e-05	0.0116148
GO:0002009	BP	morphogenesis of an epithelium	537	431	0.000267865	0.0411734
GO:0003690	MF	double-stranded DNA binding	943	748	1.29828e-05	0.00324113
GO:0003700	MF	DNA-binding transcription factor activity	1657	1286.33	1.11731e-07	7.93217e-05
GO:0003712	MF	transcription coregulator activity	554	442.533	0.000149127	0.026676
GO:0004672	MF	protein kinase activity	583	465.167	0.000287211	0.0437911
GO:0005515	MF	protein binding	11501	8311.92	1.36618e-05	0.00337048
GO:0005524	MF	ATP binding	1452	1126.67	2.96406e-06	0.000948415
GO:0006351	BP	transcription, DNA-templated	3504	2639.7	4.83623e-08	4.25732e-05
GO:0006355	BP	regulation of transcription, DNA-templated	3339	2521.2	3.97177e-08	4.10139e-05
GO:0006357	BP	regulation of transcription by RNA polymerase II	2541	1947.53	1.70358e-08	3.47425e-05
GO:0006366	BP	transcription by RNA polymerase II	2675	2043.03	2.92218e-08	3.494e-05
GO:0007167	BP	enzyme linked receptor protein signaling pathway	1037	809.417	1.0685e-05	0.00282258
GO:0007178	BP	transmembrane receptor protein serine/threonine kinase signaling pathway	345	279.833	0.000175549	0.030213
GO:0007275	BP	multicellular organism development	5402	3955.97	0.00014378	0.026342
GO:0007399	BP	nervous system development	2353	1856.14	8.30184e-12	1.88601e-07
GO:0007409	BP	axonogenesis	467	389	1.24286e-05	0.00317252
GO:0007411	BP	axon guidance	276	238.5	5.82991e-06	0.00172005
GO:0007417	BP	central nervous system development	996	804.5	2.45444e-08	3.47425e-05
GO:0007420	BP	brain development	722	588.5	2.87138e-07	0.000137219
GO:0008092	MF	cytoskeletal protein binding	967	758.667	6.59891e-05	0.0132667
GO:0008134	MF	transcription factor binding	652	532	3.20116e-07	0.000142596
GO:0008144	MF	drug binding	1699	1287.17	0.000195348	0.0316994
GO:0009058	BP	biosynthetic process	6079	4453.73	3.99669e-06	0.00126107
GO:0009059	BP	macromolecule biosynthetic process	4905	3626.73	9.10388e-07	0.000328289
GO:0009653	BP	anatomical structure morphogenesis	2710	2078.67	2.25921e-08	3.47425e-05
GO:0009719	BP	response to endogenous stimulus	1693	1291.92	2.5713e-06	0.000868404
GO:0009790	BP	embryo development	1014	814.167	2.05844e-07	0.000109642
GO:0009887	BP	animal organ morphogenesis	1064	833.583	0.000164853	0.0285888
GO:0009889	BP	regulation of biosynthetic process	4176	3093.45	9.20439e-06	0.00246006
GO:0009891	BP	positive regulation of biosynthetic process	1984	1524.33	2.49667e-07	0.000128907
GO:0009893	BP	positive regulation of metabolic process	3721	2782.67	3.85687e-07	0.000165321
GO:0010033	BP	response to organic substance	3283	2407.92	0.000191487	0.0316578
GO:0010556	BP	regulation of macromolecule biosynthetic process	3957	2938.95	7.57464e-06	0.00208548
GO:0010557	BP	positive regulation of macromolecule biosynthetic process	1854	1436.17	6.89652e-08	5.14024e-05
GO:0010604	BP	positive regulation of macromolecule metabolic process	3463	2596.33	1.9735e-07	0.000109351
GO:0010628	BP	positive regulation of gene expression	2245	1708.58	1.78791e-07	0.000101545
GO:0010646	BP	regulation of cell communication	3568	2638.5	0.000318071	0.0478538
GO:0010761	BP	fibroblast migration	39	38.5	0.000214091	0.0342516
GO:0010769	BP	regulation of cell morphogenesis involved in differentiation	297	248	0.000201756	0.0325071
GO:0016043	BP	cellular component organization	6168	4579.44	1.27635e-08	3.47425e-05
GO:0016772	MF	transferase activity, transferring phosphorus-containing groups	919	711	0.000328789	0.0488198
GO:0016773	MF	phosphotransferase activity, alcohol group as acceptor	686	548	4.22891e-05	0.00923772
GO:0017076	MF	purine nucleotide binding	1857	1410.17	5.95361e-05	0.0121851
GO:0018130	BP	heterocycle biosynthetic process	4079	3062.03	1.41164e-08	3.47425e-05
GO:0019219	BP	regulation of nucleobase-containing compound metabolic process	3901	2928.2	4.87236e-08	4.25732e-05
GO:0019438	BP	aromatic compound biosynthetic process	4089	3066.03	2.3714e-08	3.47425e-05
GO:0019899	MF	enzyme binding	2189	1667.87	8.85908e-06	0.00239596
GO:0022008	BP	neurogenesis	1609	1276	1.4125e-08	3.47425e-05
GO:0023051	BP	regulation of signaling	3610	2672	0.000192304	0.0316578
GO:0030054	CC	cell junction	1850	1454.01	2.55308e-08	3.47425e-05
GO:0030182	BP	neuron differentiation	1352	1076	1.57228e-07	9.39976e-05
GO:0030554	MF	adenyl nucleotide binding	1520	1177.5	2.86152e-06	0.000928686
GO:0031175	BP	neuron projection development	966	763.5	0.000246632	0.0386413
GO:0031323	BP	regulation of cellular metabolic process	6096	4466.87	6.98225e-06	0.00198278
GO:0031325	BP	positive regulation of cellular metabolic process	3268	2459	4.70307e-07	0.000193852
GO:0031326	BP	regulation of cellular biosynthetic process	4096	3027.95	3.85654e-05	0.0087613
GO:0031328	BP	positive regulation of cellular biosynthetic process	1951	1499.83	4.36902e-07	0.000183806
GO:0032502	BP	developmental process	6377	4639.8	0.000194927	0.0316994
GO:0032553	MF	ribonucleotide binding	1860	1411.83	7.55558e-05	0.0149259
GO:0032555	MF	purine ribonucleotide binding	1844	1400.83	6.78673e-05	0.0135246
GO:0032559	MF	adenyl ribonucleotide binding	1509	1169.17	2.79439e-06	0.000920043
GO:0032774	BP	RNA biosynthetic process	3563	2683.53	3.57357e-08	3.86592e-05
GO:0032989	BP	cellular component morphogenesis	778	628	1.75537e-05	0.00419773
GO:0032990	BP	cell part morphogenesis	680	554.5	2.27291e-05	0.00526898
GO:0034329	BP	cell junction assembly	407	342.5	6.67614e-07	0.000248637
GO:0034330	BP	cell junction organization	660	536.273	4.09391e-06	0.00127405
GO:0034645	BP	cellular macromolecule biosynthetic process	4759	3525.4	3.62678e-07	0.000158448
GO:0034654	BP	nucleobase-containing compound biosynthetic process	4017	3019.03	1.17276e-08	3.47425e-05
GO:0035639	MF	purine ribonucleoside triphosphate binding	1780	1353.33	6.05396e-05	0.0122798
GO:0043167	MF	ion binding	6059	4438.38	7.9258e-05	0.0153635
GO:0043168	MF	anion binding	2729	2059.9	2.59933e-06	0.000868404
GO:0043412	BP	macromolecule modification	4263	3124.08	0.000328268	0.0488198
GO:0043565	MF	sequence-specific DNA binding	1091	867	3.01105e-07	0.000139602
GO:0044249	BP	cellular biosynthetic process	5896	4317.23	1.37976e-05	0.00337048
GO:0044260	BP	cellular macromolecule metabolic process	8079	5871.15	1.15109e-05	0.0030058
GO:0044271	BP	cellular nitrogen compound biosynthetic process	4752	3506.57	7.61926e-06	0.00208548
GO:0045202	CC	synapse	1165	915.5	8.6422e-05	0.0164986
GO:0045664	BP	regulation of neuron differentiation	647	520.5	0.000126183	0.023306
GO:0045892	BP	negative regulation of transcription, DNA-templated	1186	937.833	1.54304e-07	9.39976e-05
GO:0045893	BP	positive regulation of transcription, DNA-templated	1512	1189.5	2.51328e-08	3.47425e-05
GO:0045934	BP	negative regulation of nucleobase-containing compound metabolic process	1415	1103.5	3.19526e-07	0.000142596
GO:0045935	BP	positive regulation of nucleobase-containing compound metabolic process	1840	1429.67	7.01415e-08	5.14024e-05
GO:0045944	BP	positive regulation of transcription by RNA polymerase II	1185	939	1.1543e-07	7.94646e-05
GO:0046660	BP	female sex differentiation	113	98.5	0.000232499	0.03668
GO:0048468	BP	cell development	2164	1646.75	0.000180583	0.0308457
GO:0048518	BP	positive regulation of biological process	6002	4427.08	5.62783e-08	4.56618e-05
GO:0048522	BP	positive regulation of cellular process	5474	4048.42	5.15185e-07	0.000197067
GO:0048565	BP	digestive tract development	134	118.5	9.8437e-05	0.0184817
GO:0048568	BP	embryonic organ development	427	354	2.77435e-05	0.00636644
GO:0048598	BP	embryonic morphogenesis	584	480.667	1.56078e-06	0.000545505
GO:0048666	BP	neuron development	1097	866.5	5.63611e-05	0.0118557
GO:0048667	BP	cell morphogenesis involved in neuron differentiation	579	481.5	1.13541e-06	0.000403037
GO:0048699	BP	generation of neurons	1510	1200	2.5998e-08	3.47425e-05
GO:0048731	BP	system development	4834	3550.8	0.000152751	0.0271108
GO:0048812	BP	neuron projection morphogenesis	643	528	7.07002e-06	0.00198292
GO:0048856	BP	anatomical structure development	5888	4297.3	0.000223602	0.035523
GO:0048858	BP	cell projection morphogenesis	661	542	6.68698e-06	0.00192297
GO:0050767	BP	regulation of neurogenesis	813	647.5	7.94076e-05	0.0153635
GO:0051128	BP	regulation of cellular component organization	2318	1765.83	6.48116e-06	0.00188768
GO:0051130	BP	positive regulation of cellular component organization	1169	900.833	0.000191421	0.0316578
GO:0051171	BP	regulation of nitrogen compound metabolic process	5734	4198.03	2.14396e-05	0.0050213
GO:0051173	BP	positive regulation of nitrogen compound metabolic process	3123	2360	5.86103e-08	4.59141e-05
GO:0051239	BP	regulation of multicellular organismal process	3216	2386.5	3.94137e-05	0.00886536
GO:0051252	BP	regulation of RNA metabolic process	3648	2751.87	1.46239e-08	3.47425e-05
GO:0051253	BP	negative regulation of RNA metabolic process	1323	1038.67	1.69759e-07	9.8887e-05
GO:0051254	BP	positive regulation of RNA metabolic process	1682	1314	4.81837e-08	4.25732e-05
GO:0051960	BP	regulation of nervous system development	921	734.5	1.27874e-05	0.00322782
GO:0055123	BP	digestive system development	146	127.5	0.000158312	0.0276657
GO:0060284	BP	regulation of cell development	943	738.25	0.000254071	0.0395341
GO:0060322	BP	head development	764	622.5	1.53501e-07	9.39976e-05
GO:0060562	BP	epithelial tube morphogenesis	322	267	0.000268231	0.0411734
GO:0061564	BP	axon development	511	417.5	0.000186047	0.031542
GO:0065008	BP	regulation of biological quality	3994	2950.35	5.88164e-05	0.0121472
GO:0070848	BP	response to growth factor	728	572.083	5.18799e-05	0.0111189
GO:0071310	BP	cellular response to organic substance	2714	2017.5	1.22557e-05	0.00316392
GO:0071363	BP	cellular response to growth factor stimulus	699	550.083	5.74514e-05	0.0119741
GO:0071495	BP	cellular response to endogenous stimulus	1432	1106.67	2.89925e-07	0.000137219
GO:0071840	BP	cellular component organization or biogenesis	6353	4703.97	2.7588e-08	3.48191e-05
GO:0072001	BP	renal system development	293	247.833	1.4789e-05	0.00357421
GO:0072073	BP	kidney epithelium development	140	122	0.000293495	0.0444507
GO:0080090	BP	regulation of primary metabolic process	5906	4317.73	4.22783e-05	0.00923772
GO:0097367	MF	carbohydrate derivative binding	2182	1646.83	2.0438e-05	0.00483658
GO:0097485	BP	neuron projection guidance	277	239.5	5.20738e-06	0.00156632
GO:0097659	BP	nucleic acid-templated transcription	3550	2672.53	5.26112e-08	4.42674e-05
GO:0120039	BP	plasma membrane bounded cell projection morphogenesis	657	540	2.1459e-06	0.000738646
GO:0140110	MF	transcription regulator activity	2001	1552.87	9.47909e-09	3.47425e-05
GO:1901265	MF	nucleoside phosphate binding	2088	1575.5	0.000110687	0.0206114
GO:1901362	BP	organic cyclic compound biosynthetic process	4236	3171.53	1.70418e-08	3.47425e-05
GO:1901576	BP	organic substance biosynthetic process	5982	4384.9	4.74632e-06	0.00145712
GO:1902679	BP	negative regulation of RNA biosynthetic process	1236	973.667	2.07527e-07	0.000109642
GO:1902680	BP	positive regulation of RNA biosynthetic process	1598	1254.5	2.05974e-08	3.47425e-05
GO:1903506	BP	regulation of nucleic acid-templated transcription	3397	2563.03	4.2966e-08	4.24392e-05
GO:1903507	BP	negative regulation of nucleic acid-templated transcription	1234	971.667	2.61423e-07	0.000131978
GO:1903508	BP	positive regulation of nucleic acid-templated transcription	1597	1253.5	2.27915e-08	3.47425e-05
GO:1990837	MF	sequence-specific double-stranded DNA binding	851	687.5	2.83621e-07	0.000137219
GO:2000112	BP	regulation of cellular macromolecule biosynthetic process	3825	2847.12	5.23992e-06	0.00156632
GO:2000113	BP	negative regulation of cellular macromolecule biosynthetic process	1452	1103.08	0.000189702	0.0316578
GO:2001141	BP	regulation of RNA biosynthetic process	3402	2568.03	3.14171e-08	3.56867e-05
Ontology codes are BP = biological process, CC = cellular component, MF = molecular function. N is number of genes in the GO term, DE is the number of genes that are differentially methylated, P.DE is the p-value for over-representation of the GO term, and FDR is the False discovery rate q value.

[truncated: 5 more sheets: Supplementary Table S11, Supplementary Table S12, Supplementary Table S13, Supplementary Table S14, Supplementary Table S15]
